# Supplementary material for: The judgment grounds in surrogate decision-making in Japanese clinical practice: A qualitative survey
Source: Research Square preprint supplement (doi:10.21203/rs.3.rs-24105/v2), 2020-10-13
Supplement: Supplementary file 1 [file 99fa6d74669c65c2aff5baf9.xlsx]

## Sheet: Sheet1
Sex (surrogate decision maker)	Age (surrogate decision maker)	Relationship with patient	Interview time（minutes）	Sex(patient)	Age(patient)	living together（patient and surrogate decision maker）	Inpatient department	Content of surrogate decision making
								Life prolonged treatment	Ventilator	Artificial nutrition	Treatment Place	Dialysis
Female	30s	daughter in law	48	Male	70s	NO	Cardiology	○	○	○	○	○
Female	40s	the eldest daughter	50	Male	70s	NO	Neurology			○
Female	40s	daughter in law	40	Male	70s	NO	Respiratory	○	○
Male	60s	the second son	50	Male	80s	NO	Neurology	○		○	○
Male	60s	the eldest son	26	Female	90s	NO	Internal medicine	○	○
Female	40s	the eldest daughter	40	Male	80s	NO	Neurology			○	○
Male	40s	the eldest son	25	Male	60s	NO	Cardiology		○	○
Female	50s	daughter in law	45	Female	70s	NO	Internal medicine	○			○
Female	50s	the second daughter	37	Male	80s	NO	Internal medicine			○
Female	40s	the second daughter	34	Male	70s	NO	Neurosurgery			○	○
Female	50s	daughter in law	48	Female	70s	YES	Neurosurgery	○		○	○
Female	60s	the second daughter	37	Female	70s	YES	Internal medicine	○	○	○	○
Male	60s	the eldest son	37	Female	80s	YES	Internal medicine			○
Male	50s	the eldest son	54	Female	80s	NO	Internal medicine	○	○	○		○
